# Supplementary material for: Transposing an active fault database into a fault-based seismic hazard assessment for nuclear facilities – Part 2: Impact of fault parameter uncertainties on a site-specific PSHA exercise in the Upper Rhine Graben, eastern France
Source: Copernicus journal article supplement (doi:10.5194/nhess-17-1585-2017), 2017-09-20
Supplement: Supplementary file 1 [file nhess-17-1585-2017-supplement.zip]

Archive with 4 entries (3 files):
- nhess-17-1585-2017-supplement-title-page.pdf
- Annex/
- Annex/Caption_annex.pdf
- Annex/Figure_annex.pdf
