# Supplementary material for: Transposing an active fault database into a fault-based seismic hazard assessment for nuclear facilities – Part 2: Impact of fault parameter uncertainties on a site-specific PSHA exercise in the Upper Rhine Graben, eastern France
Source: Copernicus journal article supplement (doi:10.5194/nhess-17-1585-2017), 2017-09-20
Supplement: Supplementary file 1 [file nhess-17-1585-2017-supplement.zip › Annex/Caption_annex.pdf]

**Figure Annex:** a) Potentially active faults from BDFA (in black), selected segments for PSHA calculation in colour (depending on the age of the last movement on the fault). b) Fault model as produced for PSHA. Black lines correspond to the surficial trace of the faults, in light blue the projection of fault planes at the surface (taking into account a 15km depth and the max. dip angle), in light red the closest fault to FSH (Fessenheim NPP). c) Table containing principal parameters as exported from BDFA (grey and white columns) table and their transposition into the parametric PSHA fault model (light green columns).
