# Supplementary material for: Transposing an active fault database into a fault-based seismic hazard assessment for nuclear facilities – Part 2: Impact of fault parameter uncertainties on a site-specific PSHA exercise in the Upper Rhine Graben, eastern France
Source: Copernicus journal article supplement (doi:10.5194/nhess-17-1585-2017), 2017-09-20
Supplement: Supplementary file 1 [file nhess-17-1585-2017-supplement.zip › Annex/Figure_annex.pdf]

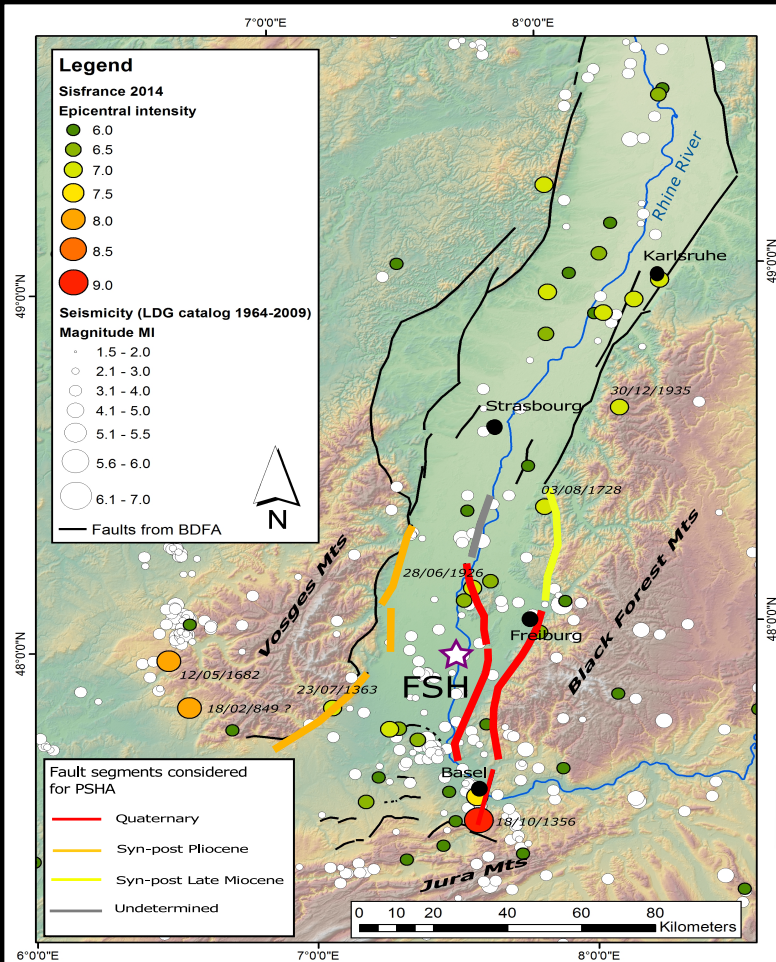

a)

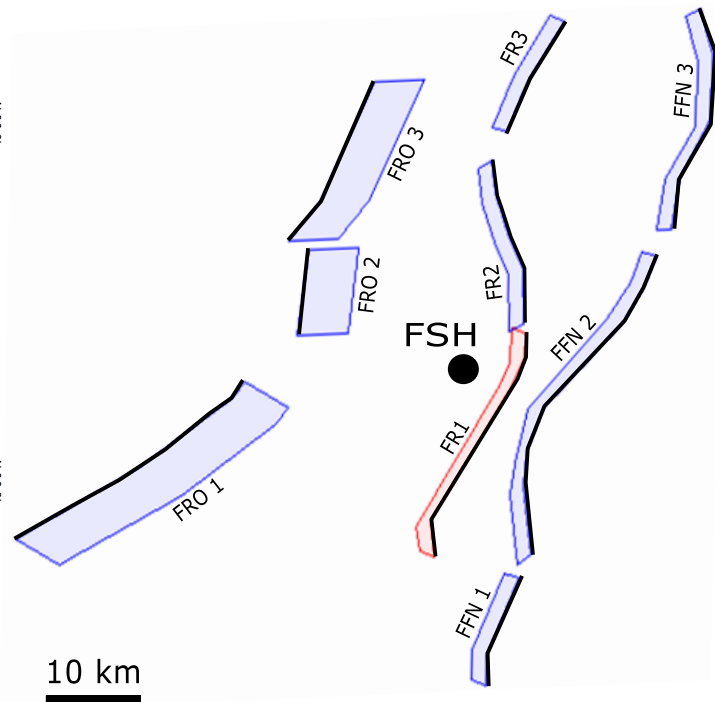

b)

c)

| Fault_Name         | Segment_Name       | Segment name PSHA | Dip (°) | ± Dip | Dip PSHA | Depth (km) | ± Depth | Depth PSHA | Length (km) | Length PSHA | Neotectonic_Age | slip rate (mm/yr) | Slip rate PSHA | Robustness (IR) | Bibliography for BDFA                                                                                                                                |
|--------------------|--------------------|-------------------|---------|-------|----------|------------|---------|------------|-------------|-------------|-----------------|-------------------|----------------|-----------------|------------------------------------------------------------------------------------------------------------------------------------------------------|
| Rhine River Fault  | FRR-1              | FR1               | 65 W    | 15    | 70 ± 10  | 15         | 5       | 15 to 20   | 35          | 36          | Quaternary      | UnDef             | 0,04 to 0,1    | 15.4            | Segmentation & geometry (Rotstein et al., 2005 ; Nivière et al., 2008 ; Behrmann et al., 2003) - Slip rate (Nivière et al., 2008)                    |
|                    | FRR-2              | FR2               | 65 W    | 15    | 70 ± 10  | 15         | 5       | 15 to 20   | 25          | 27          | Quaternary      | 0,04 - 0,09       | 0,04 to 0,1    | 11              |                                                                                                                                                      |
|                    | FRR-3              | FR3               | 70 W    | 99    | 70 ± 10  | 15         | 5       | 15 to 20   | 20          | 20          | Undetermined    | < 0,1             | 0,04 to 0,1    | 4.4             |                                                                                                                                                      |
| West Rhenish Fault | Belfort-Guebwiller | FR01              | 50 E    | 99    | 50 ± 10  | 3.5        | 99      | 15 to 20   | 36          | 36          | Pliocene        | UnDef             | 0,01 to 0,05   | 14.3            | Segmentation & geometry (Rotstein et Schaming., 2008, Ford et al., 2007, Bertrand, 2005) - Slip rate (Nivière et al., 2008 ; Cornu et Bertrand 2005) |
|                    | Guebwiller-Colmar  | FR02              | 55 E    | 99    | 50 ± 10  | 2.5        | 99      | 15 to 20   | 16          | 16          | Pliocene        | UnDef             | 0,01 to 0,05   | 6.6             |                                                                                                                                                      |
|                    | Colmar-Sélestat    | FR03              | 60 E    | 99    | 50 ± 10  | 1.5        | 99      | 15 to 20   | 27          | 27          | Pliocene        | UnDef             | 0,01 to 0,05   | 6.6             |                                                                                                                                                      |
| Black Forest Fault | FFN-1              | FFN1              | 40 W    | 99    | 70 ± 10  | 15         | 5       | 15 to 20   | 20          | 15          | Quaternary      | UnDef             | 0,05 to 0,15   | 11              | Segmentation & geometry (Behrmann et al., 2003 ; Nivière et al., 2008) - Slip rate (Nivière et al., 2008)                                            |
|                    | FFN-2              | FFN2              | 50 W    | 99    | 70 ± 10  | 15         | 5       | 15 to 20   | 50          | 50          | Quaternary      | 0,07 - 0,18       | 0,05 to 0,15   | 11              |                                                                                                                                                      |
|                    | FFN-3              | FFN3              | 40 W    | 99    | 70 ± 10  | 15         | 5       | 15 to 20   | 35          | 35          | Miocene         | UnDef             | 0,05 to 0,15   | 8.8             |                                                                                                                                                      |
