# Supplementary material for: Transposing an active fault database into a fault-based seismic hazard assessment for nuclear facilities – Part 2: Impact of fault parameter uncertainties on a site-specific PSHA exercise in the Upper Rhine Graben, eastern France
Source: Copernicus journal article supplement (doi:10.5194/nhess-17-1585-2017), 2017-09-20
Supplement: Supplementary file 1 [file nhess-17-1585-2017-supplement.zip › nhess-17-1585-2017-supplement-title-page.pdf]

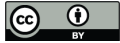

## *Supplement of*

# **Transposing an active fault database into a fault-based seismic hazard assessment for nuclear facilities – Part 2: Impact of fault parameter uncertainties on a site-specific PSHA exercise in the Upper Rhine Graben, eastern France**

**T. Chartier et al.**

*Correspondence to:* Thomas Chartier ([chartier@geologie.ens.fr](mailto:chartier@geologie.ens.fr))

- [nhess-17-1585-2017-supplement-title-page.pdf](#)
- Annex
  - [Caption\\_annex.pdf](#)
  - [Figure\\_annex.pdf](#)

The copyright of individual parts of the supplement might differ from the CC BY 3.0 License.
